# Supplementary material
Source: PubMed Central journal article supplement (PMC3425038)
Supplement: Supp_Fig1.pdf [file Supp_Fig1.pdf]

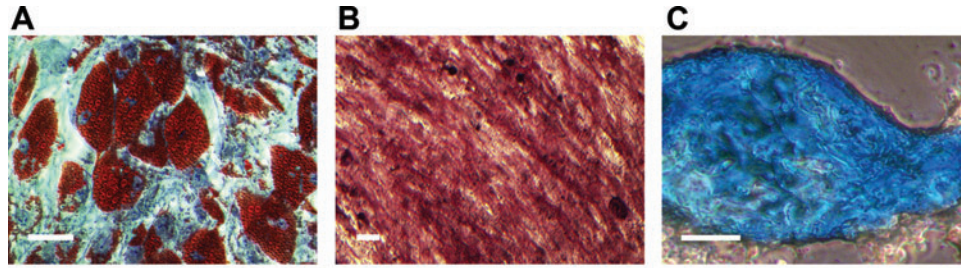

**D**

| BM-MSC population                      |       | 1    | 2    | 3    | 4    |
|----------------------------------------|-------|------|------|------|------|
| age (years)                            |       | 38   | 42   | 43   | 22   |
| gender                                 |       | m    | m    | f    | m    |
| % positive compared to isotype control | CD14  | 0.0  | 0.0  | 0.0  | 0.0  |
|                                        | CD34  | 0.0  | 0.0  | 0.0  | 0.0  |
|                                        | CD45  | 0.0  | 5.1  | 0.0  | 0.0  |
|                                        | CD73  | 95.7 | 97.8 | 95.7 | 96.3 |
|                                        | CD90  | 96.0 | 93.6 | 95.4 | 98.2 |
|                                        | CD105 | 96.1 | 96.2 | 95.8 | 66.9 |

**SUPPLEMENTARY FIG. S1.** All human mesenchymal stem cell (hMSC) populations could be effectively differentiated into the adipogenic, osteogenic, and chondrogenic lineage (A–C). Adipogenic differentiation was assessed by identification of lipid vacuoles stained in *red* by Oil Red O (A), osteogenic differentiation was assessed by positive staining for alkaline phosphatase staining in *pink to violet* (B), and chondrogenic differentiation was assessed by *blue to bluish green* staining of mucopolysaccharides by Alcian blue (C). The figure is exemplary for all tested MSC populations; scale bars: 50  $\mu\text{m}$ . Flow cytometric analyses showed that all hMSC populations highly expressed CD73, CD90, and CD105, whereas the hematopoietic markers CD14 and CD34 were not expressed (D).
