# Supplementary material
Source: PubMed Central journal article supplement (PMC3425038)
Supplement: Supp_Table1.pdf [file Supp_Table1.pdf]

SUPPLEMENTARY TABLE S1. DESCRIPTIONS OF PRIMER SEQUENCES, PROBE NUMBERS,  
AND POLYMERASE CHAIN REACTION PRODUCT LENGTHS

| <i>Target</i>                                | <i>Primer sequences</i>                  | <i>Probe number (RocheUniversal<br/>ProbeLibrary)</i> | <i>Product<br/>length (nt)</i> |
|----------------------------------------------|------------------------------------------|-------------------------------------------------------|--------------------------------|
| GAPDH (NM_002046.2)                          | agccacatcgctcagacacgccaatacgaccaaattcc   | 60                                                    | 66                             |
| Cardiac troponin I3 (NM_000363.3)            | aggaggacaccgagaaggacagtgcacatgatgtttctcc | 10                                                    | 62                             |
| Cardiac muscle alpha actin<br>(NM_005159.3)  | gcttccgctgtcctgagaatgccagcagattccatacc   | 11                                                    | 61                             |
| Cardiac myosin light chain-1<br>(AF174483.1) | ggcagaagtgtccgtgtagtccatcatcttggtattgagc | 60                                                    | 65                             |

GAPDH, glyceraldehyde 3-phosphate dehydrogenase.
